# Supplementary material for: Imaging-guided platform for real-time intervention in complex in vitro models
Source: Research Square preprint supplement (doi:10.21203/rs.3.rs-7179174/v1), 2025-08-18
Supplement: Supplementary file 1 [file 2a6dd7c9b026afa3b55bab3a.docx]

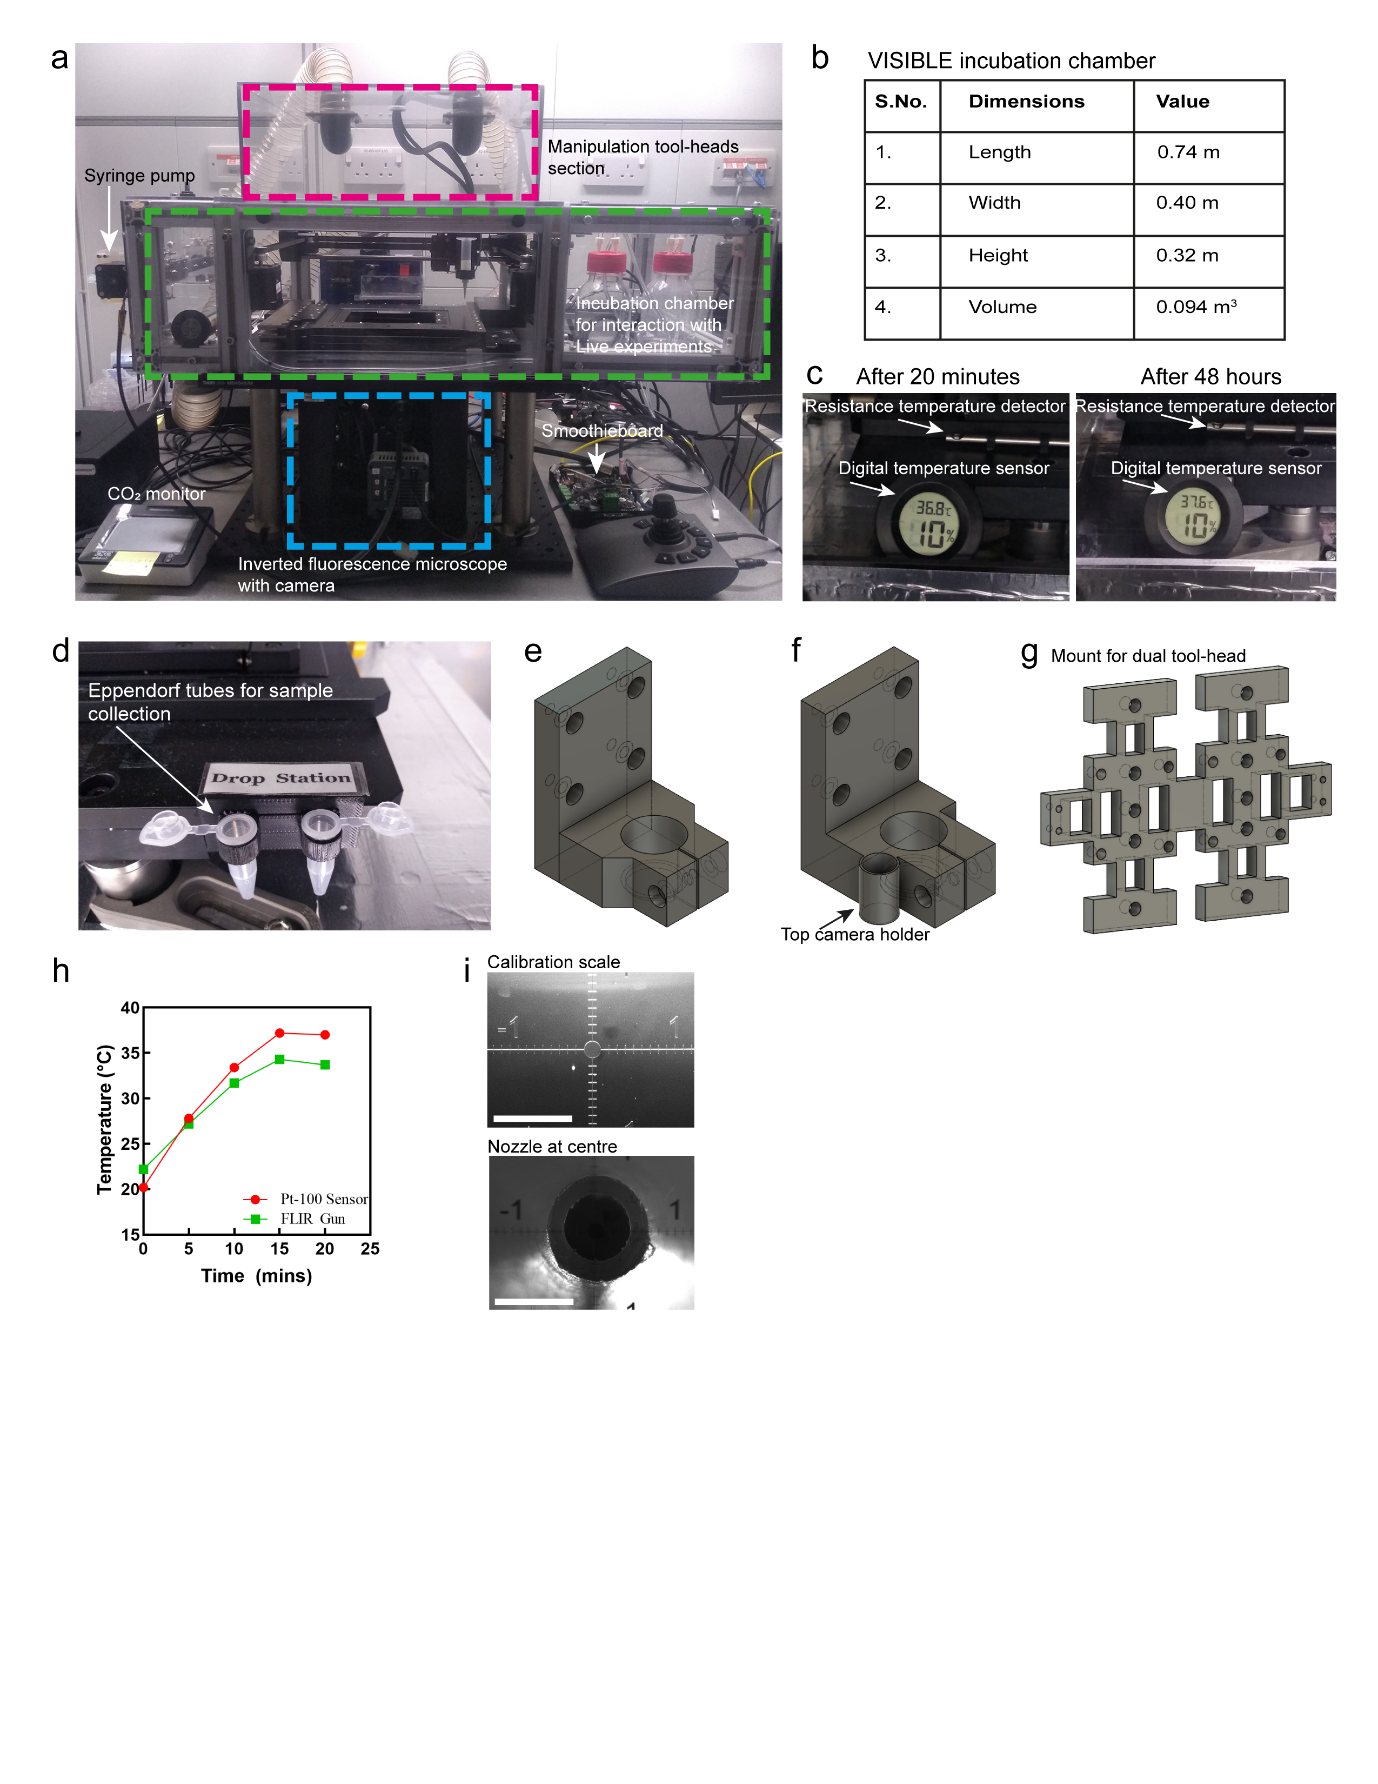


**Extended Data Figure 1: Design and engineering of the VISIBLE platform.** (**a**) Photograph of the VISIBLE platform, highlighting its different components and their respective functions. (**b**) Detailed dimensions of VISIBLE’s integrated incubation chamber. (**c**) Digital temperature sensor readout (mini temperature LCD monitor) demonstrating the consistent temperature-retaining capability over 48 hours, confirming suitability for long-term live experiments. (**d**) Photograph of the drop station, where Eppendorf tubes are precisely positioned on the stage for automated sample collection, facilitating subsequent downstream analysis. (**e-g**) Custom 3D-printed holders for the manipulation tool-head (**e**), with top camera holding slot (**f**), and a mount for attaching these components to the XY gantry (**g**), illustrating the platform's modular and adaptable design. (**h**) Temperature characteristics measured over time using two independent sensors (Pt-100 Resistance Temperature Detector and Forward Looking Infrared (FLIR) gun), confirming stable 37° C conditions suitable for in vitro cell culture experiments. (**i**) Microscopic images of a calibration scale with the nozzle precisely centred, used to assess the micrometer-level repeatability of manipulation tool-heads. Scale bar: 1 mm.

**
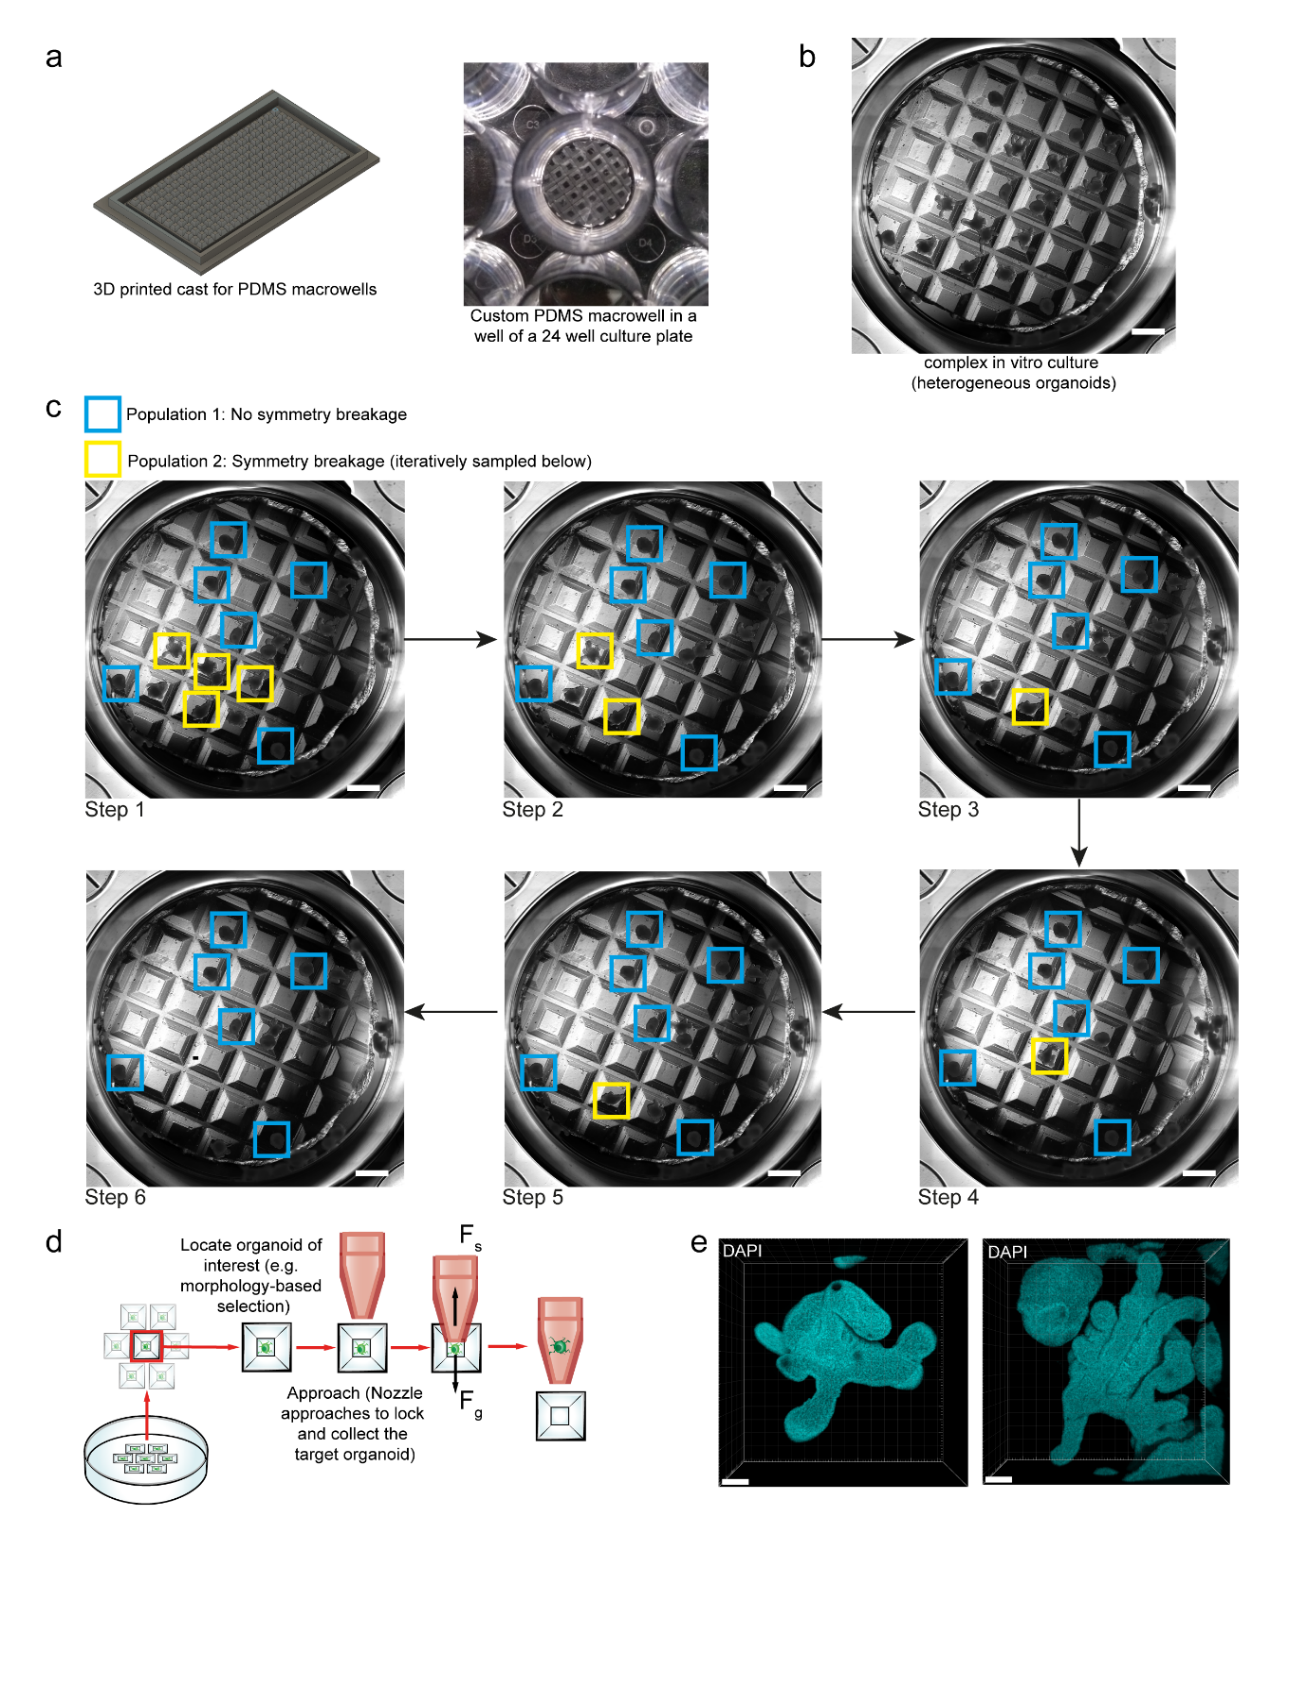
**

**Extended Data Figure 2: Image-guided precision sampling mitigates organoid heterogeneity.** (**a**) A 3D-printed cast used for generating PDMS macrowells and casted PDMS macrowell in a well of a 24-well plate, facilitating the creation of complex heterogeneous organoid cultures in suspension. (**b**) A stitched microscopic image of PDMS macrowells displaying diverse heterogeneous organoid populations, serving as a representative example of a complex in vitro cultures (CIVMs). Scale bar: 1 mm. (**c**) Sequential images illustrating the iterative sampling process of multiple organoids exhibiting broken symmetry (population 2) precisely collected by the VISIBLE platform. Scale bar: 1 mm. (**d**) Schematic outlining the procedural steps involved in locating, moving, and collecting an individual organoid, detailing the controlled forces applied during aspiration. (**e**) Immunocytochemistry (ICC) studies performed on collected organoid populations further confirm their preserved structural integrity, underscoring the VISIBLE's suitability for non-destructive sampling of complex in vitro cultures. Scale bar: 150 µm.


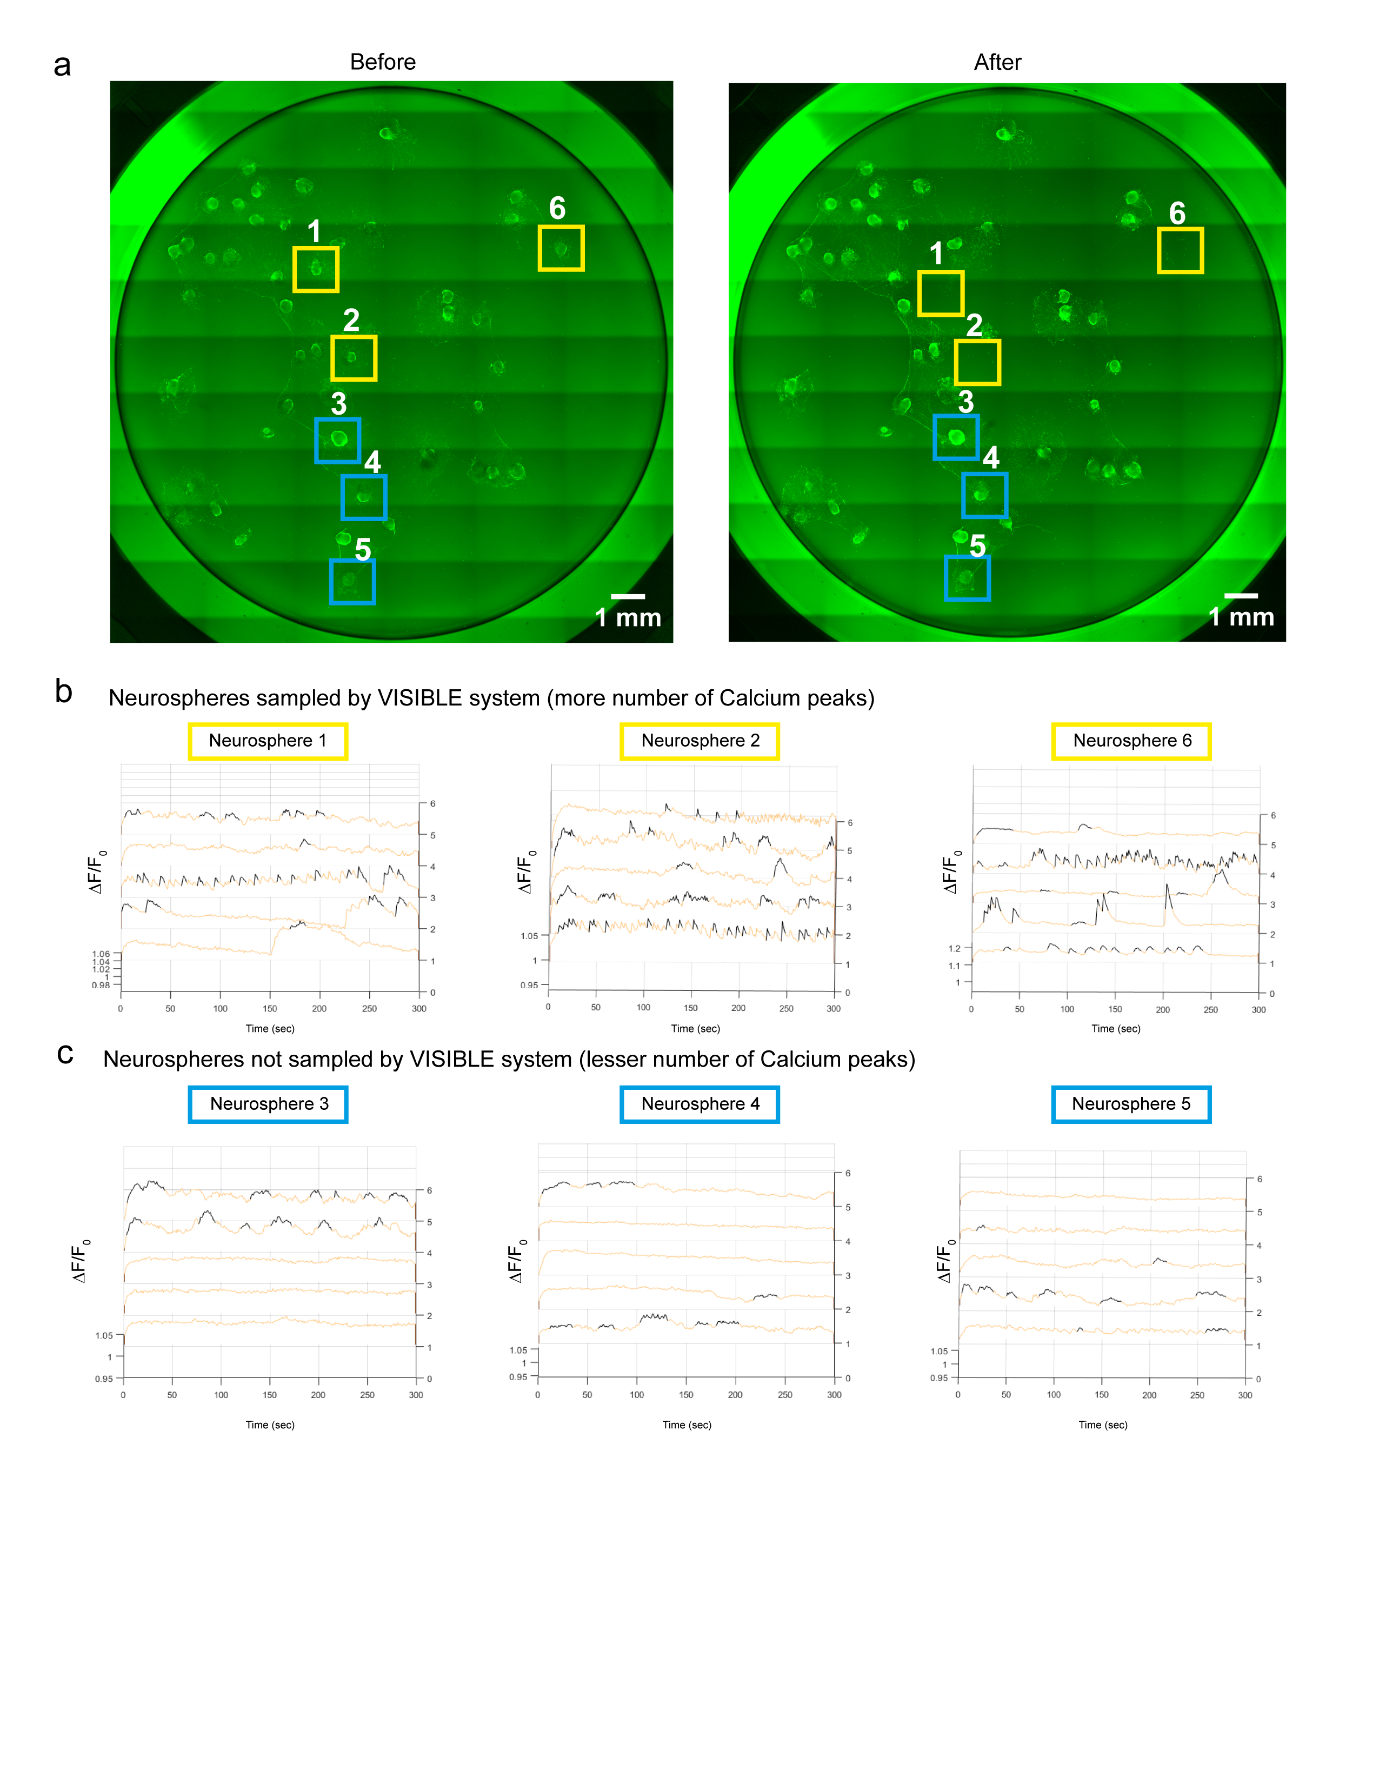


**Extended Data Figure 3: Function-based sampling of adherent neurospheres in complex culture.** (**a**) Scans of a well before and after the interactive calcium signalling experiment with the VISIBLE platform, visually demonstrating the selective removal of targeted neurospheres. Scale bar: 1mm. (**b**) Representative calcium traces (ΔF/F) from neurospheres identified as active, showing frequent transients and selected for collection. (**c**) Calcium traces from inactive neurospheres that were excluded from sampling due to reduced activity. These data confirm VISIBLE’s functional specificity in non-destructive selection of targeted structures.


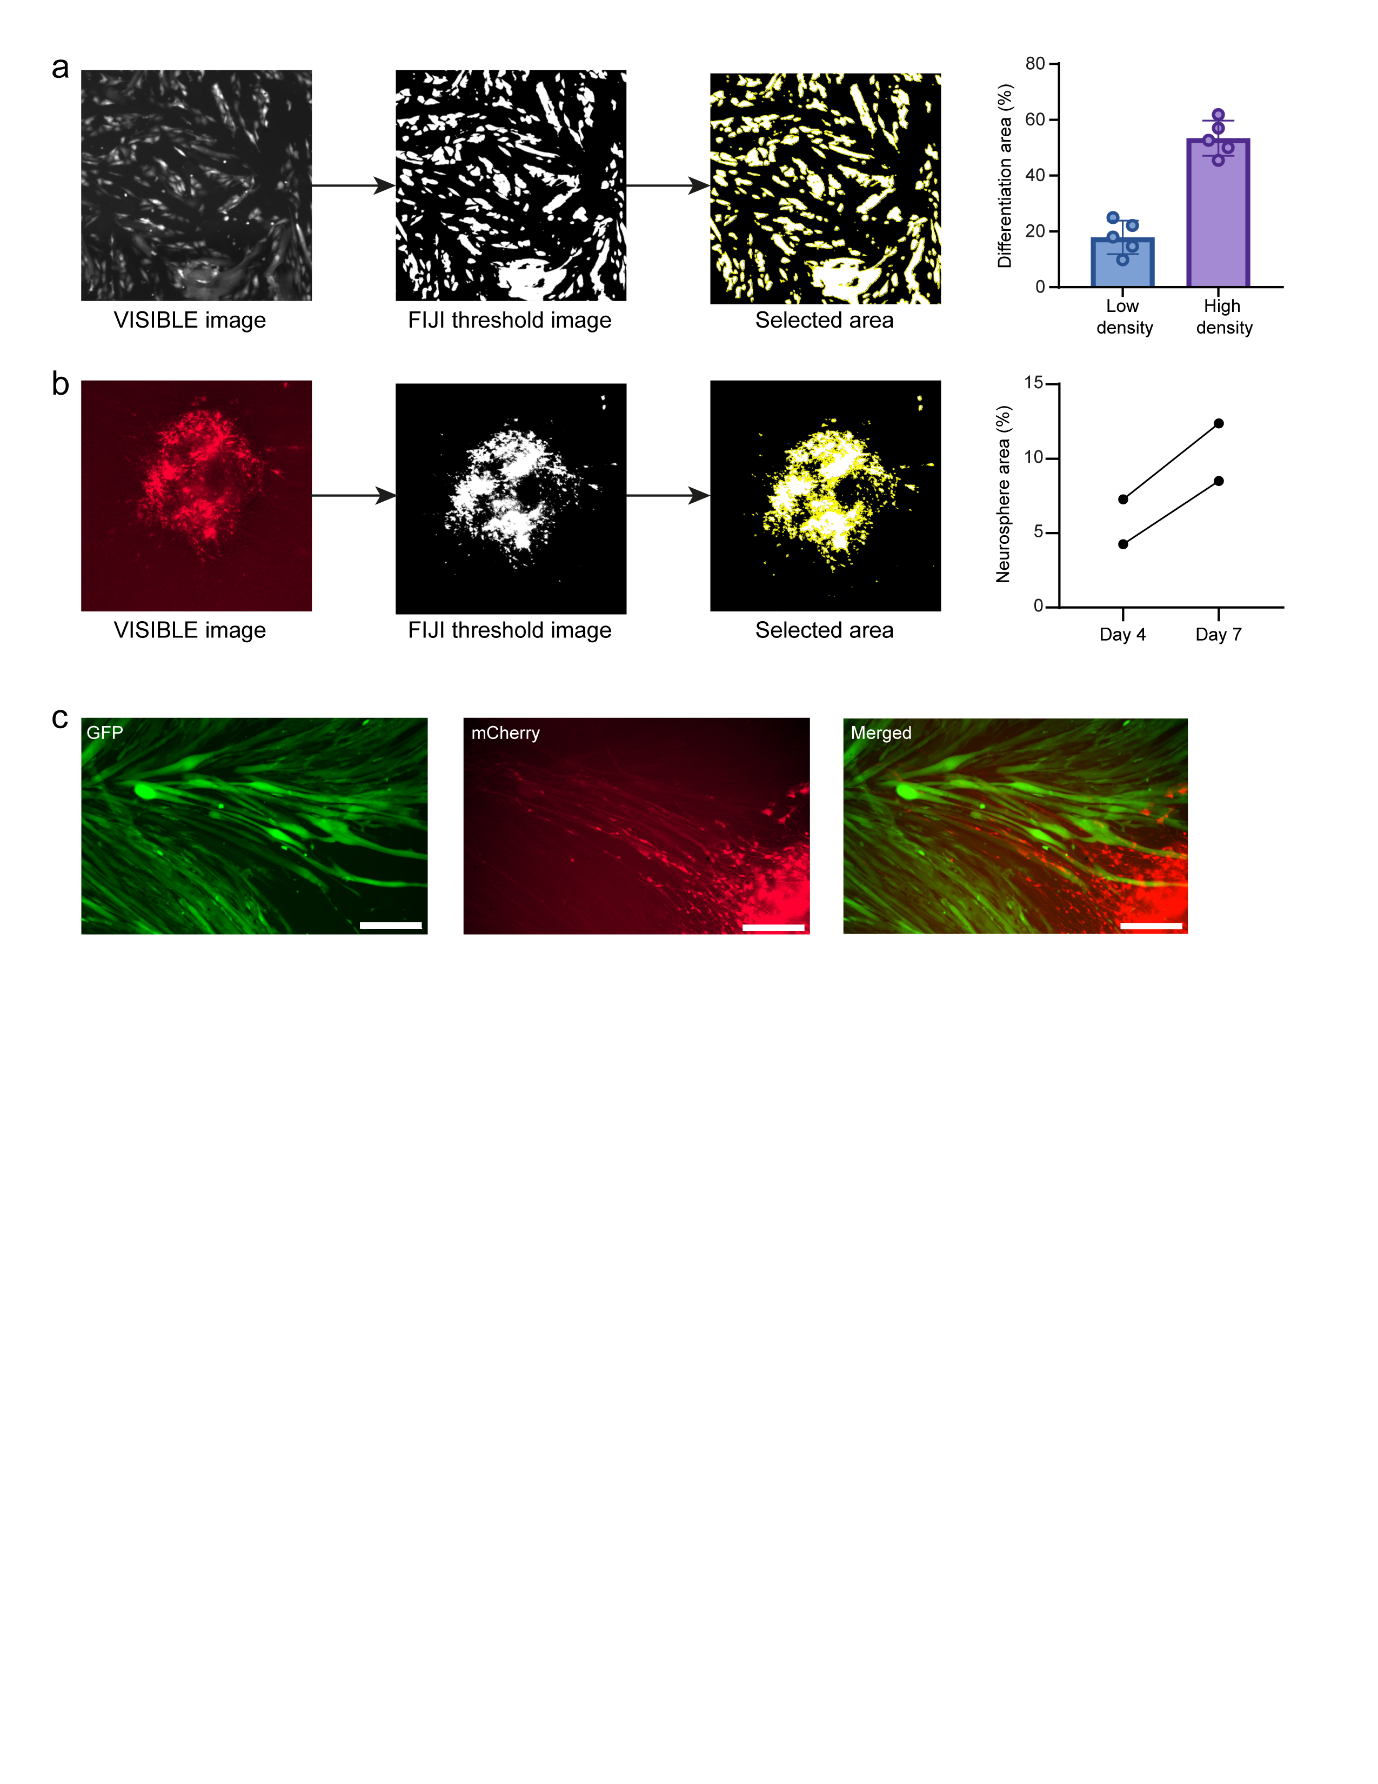


**Extended Data Figure 4: Interactive 3D bioprinting and serial intervention for spatiotemporal experiments.** (**a**) Pipeline for the analysis of skeletal muscle cell coverage area, used to identify regions of low and high density, informing the optimal location for targeted neurosphere deposition in spatiotemporal experiments. (**b**) Analysis of the coverage area by neurosphere and its processes over skeletal muscle cells after Day 4 in co-culture, providing quantitative insight into interaction dynamics. (**c**) A higher magnification image of the co-culture after 7 days, demonstrating effective and direct interaction between the deposited neurosphere and the underlying skeletal muscle cells. Scale bar: 200 µm.


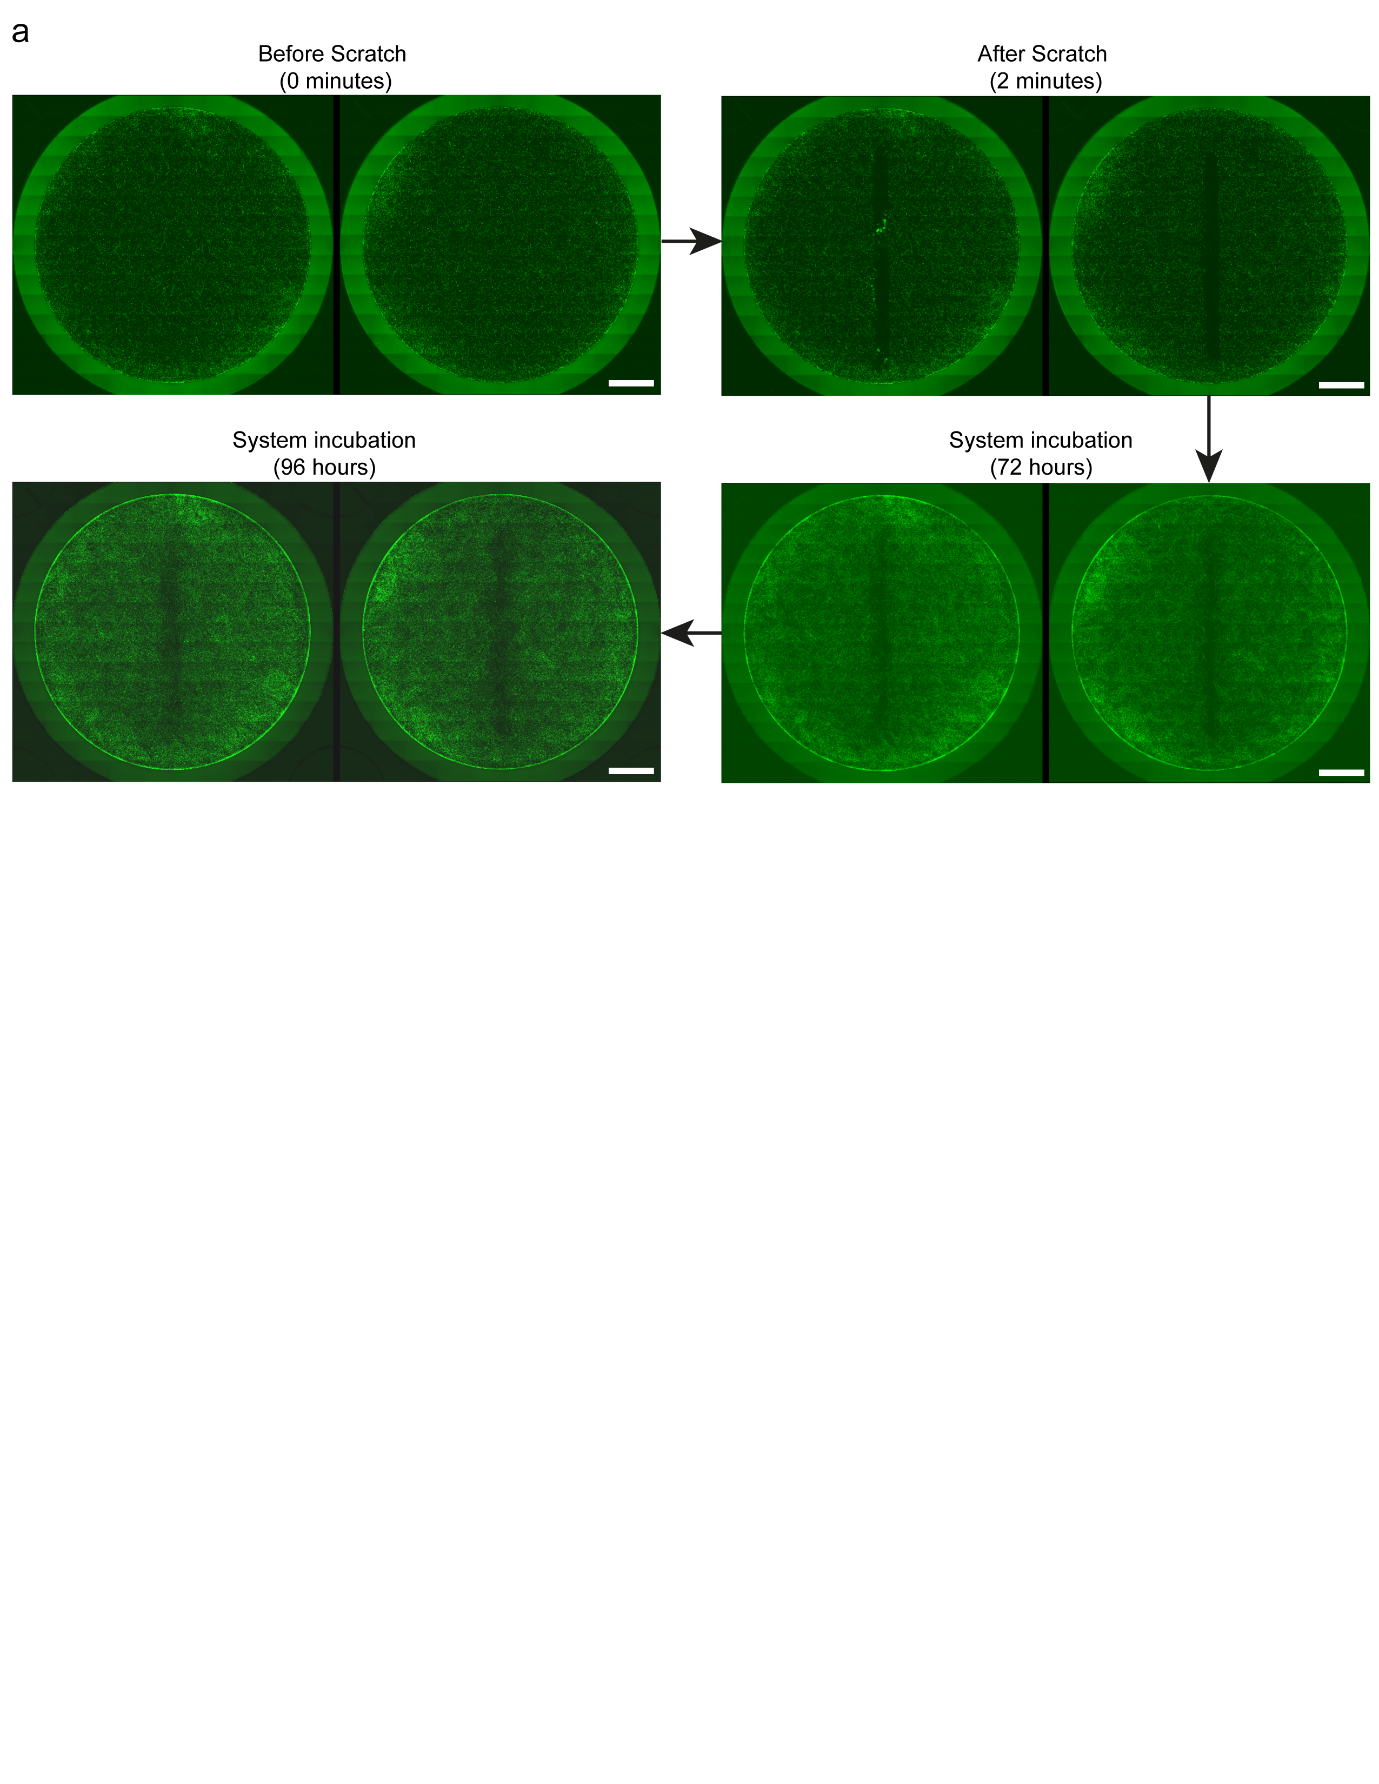


**Extended Data Figure 5: Autonomous serial intervention for reproducible longitudinal studies.** (**a**) To demonstrate the feasibility of multiplexed experiments within the VISIBLE platform, scratches were introduced autonomously into confluent muscle cell monolayers in two neighbouring wells within the same multi-well plate. A series of time-lapse images captured by VISIBLE show concurrent scratch recovery in both wells, highlighting the platform's capacity for parallel, high-throughput longitudinal studies. Scale bar: 1 mm.

**Supplementary Videos 1 to 3 are provided in FigShare:**

*https://doi.org/10.6084/m9.figshare.29310578.v1*
